# Supplementary material for: Outcome of AIDS-associated cryptococcal meningitis initially treated with 200 mg/day or 400 mg/day of fluconazole
Source: Springer Nature journal article supplement (doi:10.1186/1471-2334-6-118), 2006-07-18
Supplement: 12879_2006_382_MOESM1_ESM.pdf [file 12879_2006_382_MOESM1_ESM.pdf]

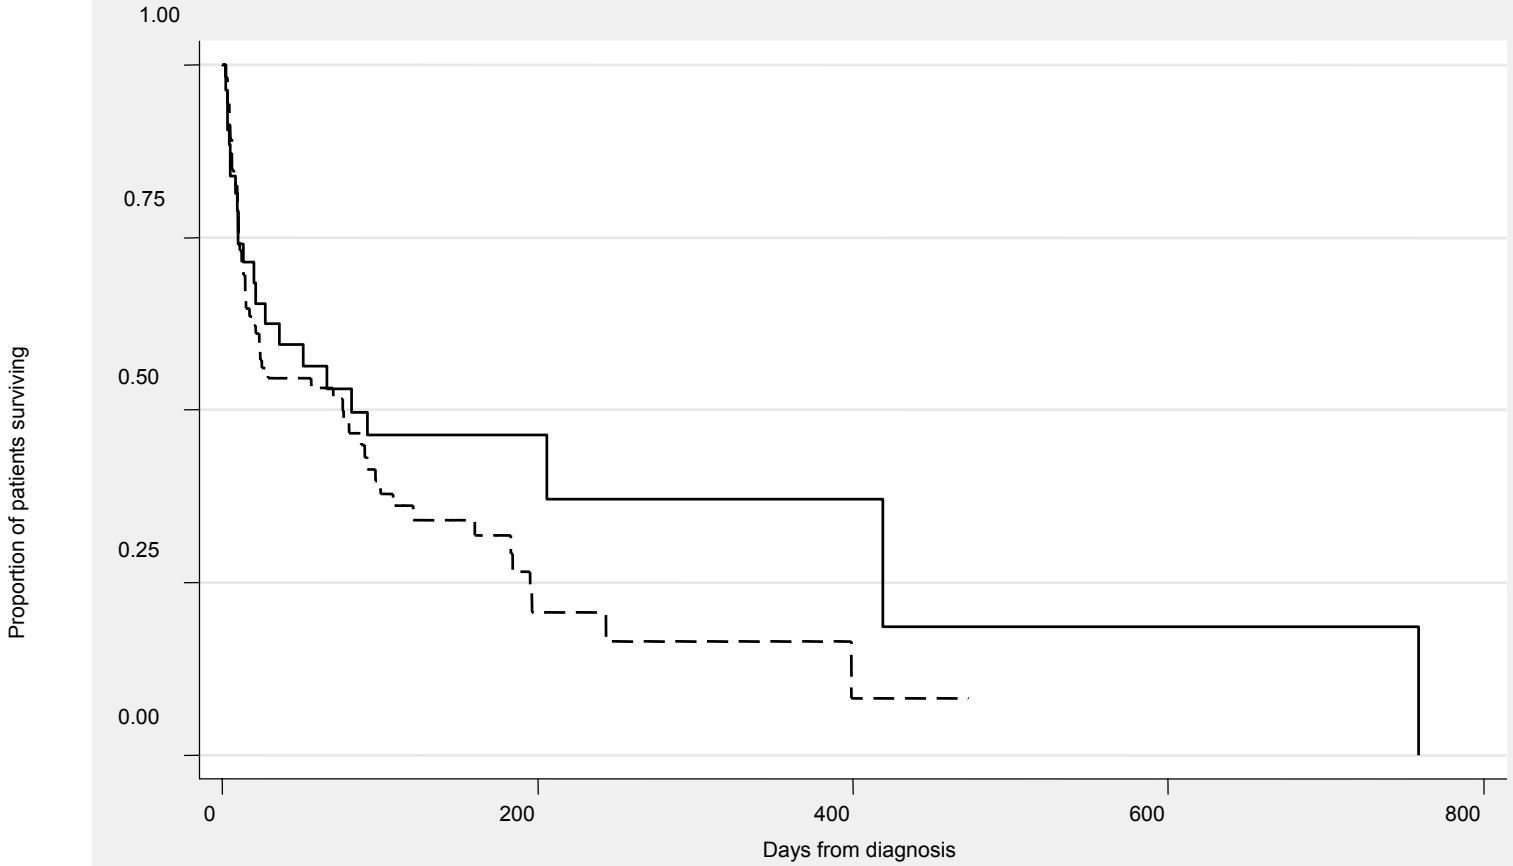

— Fluconazole 200      - - - - Fluconazole 400
